# Supplementary material for: Catalytic Characterization of Synthetic K+ and Na+ Sodalite Phases by Low Temperature Alkali Fusion of Kaolinite during the Transesterification of Spent Cooking Oil: Kinetic and Thermodynamic Properties
Source: MDPI journal article supplement (doi:10.3390/catal13030462), 2023-02-22
Supplement: s1 [file s1]

# Catalytic characterization of synthetic K<sup>+</sup> and Na<sup>+</sup> sodalite phases by low temperature alkali fusion of kaolinite during the transesterification of spent cooking: kinetic and thermodynamic properties

Mohamed Adel sayed<sup>1,2</sup>, Jamaan S. Ajarem<sup>3</sup>, Ahmed A. Allam<sup>4</sup>, Mostafa R. Abukhadra<sup>\*1, 5</sup>, Jianmin Luo<sup>6</sup>, Chuanyi Wang<sup>7</sup>, Stefano Bellucci<sup>8</sup>

<sup>1</sup>Materials Technologies and their Applications Lab, Geology Department, Faculty of Science, Beni-Suef University, Beni suef City, Egypt.

<sup>2</sup>Department of Chemistry, Faculty of Science, Beni-Suef University, 62514 Beni-Suef City, Egypt

<sup>3</sup>Zoology Department, College of Science, King Saud University, Riyadh, Saudi Arabia

<sup>4</sup>Zoology Department, Faculty of Science, Beni-Suef University, Beni-Suef, Egypt

<sup>5</sup>Geology Department, Faculty of Science, Beni-Suef University, Egypt

<sup>6</sup>School of Chemistry and Civil Engineering, Shaoguan University, Shaoguan 512005, P. R. China

<sup>7</sup>School of Environmental Science and Engineering, Shaanxi University of Science and Technology, Xi'an 710021, China

<sup>8</sup>INFN-Laboratori Nazionali di Frascati, Via E. Fermi 54, 00044 Frascati, Italy

Corresponding author Email\*: [Abukhadra89@Scinec.bsu.edu.eg](mailto:Abukhadra89@Scinec.bsu.edu.eg)

**Table.S1.** The determined fatty acid methyl esters in the obtained biodiesel sample over N.SD

| Fatty acid methyl esters |                                       |                |
|--------------------------|---------------------------------------|----------------|
| No                       | Ester                                 | Percentage (%) |
| 1                        | Palmitoleic acid methyl ester (C16:1) | 31.76          |
| 2                        | Oleic acid methyl ester (C18:1)       | 29.7           |
| 3                        | Linoleic acid methyl ester (C18:2)    | 14.6           |
| 4                        | Myristic acid methyl ester (C14:0)    | 11.2           |
| 5                        | Palmitic acid methyl ester (C16:0)    | 7.3            |
| 6                        | Eicosanoic acid methyl ester (C20:1)  | 1.8            |
| 7                        | Stearic acid methyl ester (C18:0)     | 1.2            |
| 8                        | Caprylic Acid methyl ester (C8:0)     | 1.78           |
| 9                        | Behenic Acid methyl ester (C22:0)     | 0.84           |

**Table.S2.** the Fatty acid content and physical properties of the inspected spent oil

| Fatty acid composition                                                    |                |
|---------------------------------------------------------------------------|----------------|
| Fatty acid composition                                                    | Percent        |
| Myristic acid (C <sub>14</sub> H <sub>28</sub> O <sub>2</sub> ) (C14:0)   | 11.3 %         |
| Linoleic acid(C <sub>18</sub> H <sub>32</sub> O <sub>2</sub> ) (C18:3)    | 15 %           |
| Oleic acid (C <sub>18</sub> H <sub>34</sub> O <sub>2</sub> ) (C18:1)      | 30.6 %         |
| Palmitoleic (C <sub>16</sub> H <sub>30</sub> O <sub>2</sub> ) (C16:1)     | 33.8 %         |
| Eicosanoic acid (C <sub>24</sub> H <sub>48</sub> O <sub>2</sub> ) (C20:1) | 2.5 %          |
| Palmitic acid (C <sub>16</sub> H <sub>32</sub> O <sub>2</sub> ) (C16:0)   | 2.3 %          |
| Stearic acid (C <sub>18</sub> H <sub>36</sub> O <sub>2</sub> ) (C18:0)    | 1.8 %          |
| Physical properties                                                       |                |
| Molecular weight                                                          | 922 g/mol      |
| Acid value                                                                | 2.23 mg KOH/gm |
| Saponification value                                                      | 187 mg KOH/gm  |
| Kinematic viscosity                                                       | 45.2 cSt       |
